# Supplementary material for: Comparing the Hospital Frailty Risk Score and the Clinical Frailty Scale Among Older Adults With Chronic Obstructive Pulmonary Disease Exacerbation
Source: PubMed Central journal article supplement (PMC9896302; doi:10.1001/jamanetworkopen.2022.53692), 2023-02-02
Supplement: jamanetwopen-e2253692-s001.pdf [file jamanetwopen-e2253692-s001.pdf]

## Supplemental Online Content

Chin M, Kendzerska T, Inoue J, et al. Comparing the hospital frailty risk score and the clinical frailty scale among older adults with chronic obstructive pulmonary disease exacerbation. *JAMA Netw Open*. 2023;6(2):e2253692. doi:10.1001/jamanetworkopen.2022.53692

**eFigure.** The Clinical Frailty Scale by Rockwood et al

**eTable.** Cross-Tabulation Between the HFRS and CFS to Calculate the Sensitivity and Specificity of the HFRS in Detecting 'Frail' and 'Non Frail' Individuals Based on CFS Scoring

This supplemental material has been provided by the authors to give readers additional information about their work.

eFigure. The Clinical Frailty Scale by Rockwood et al

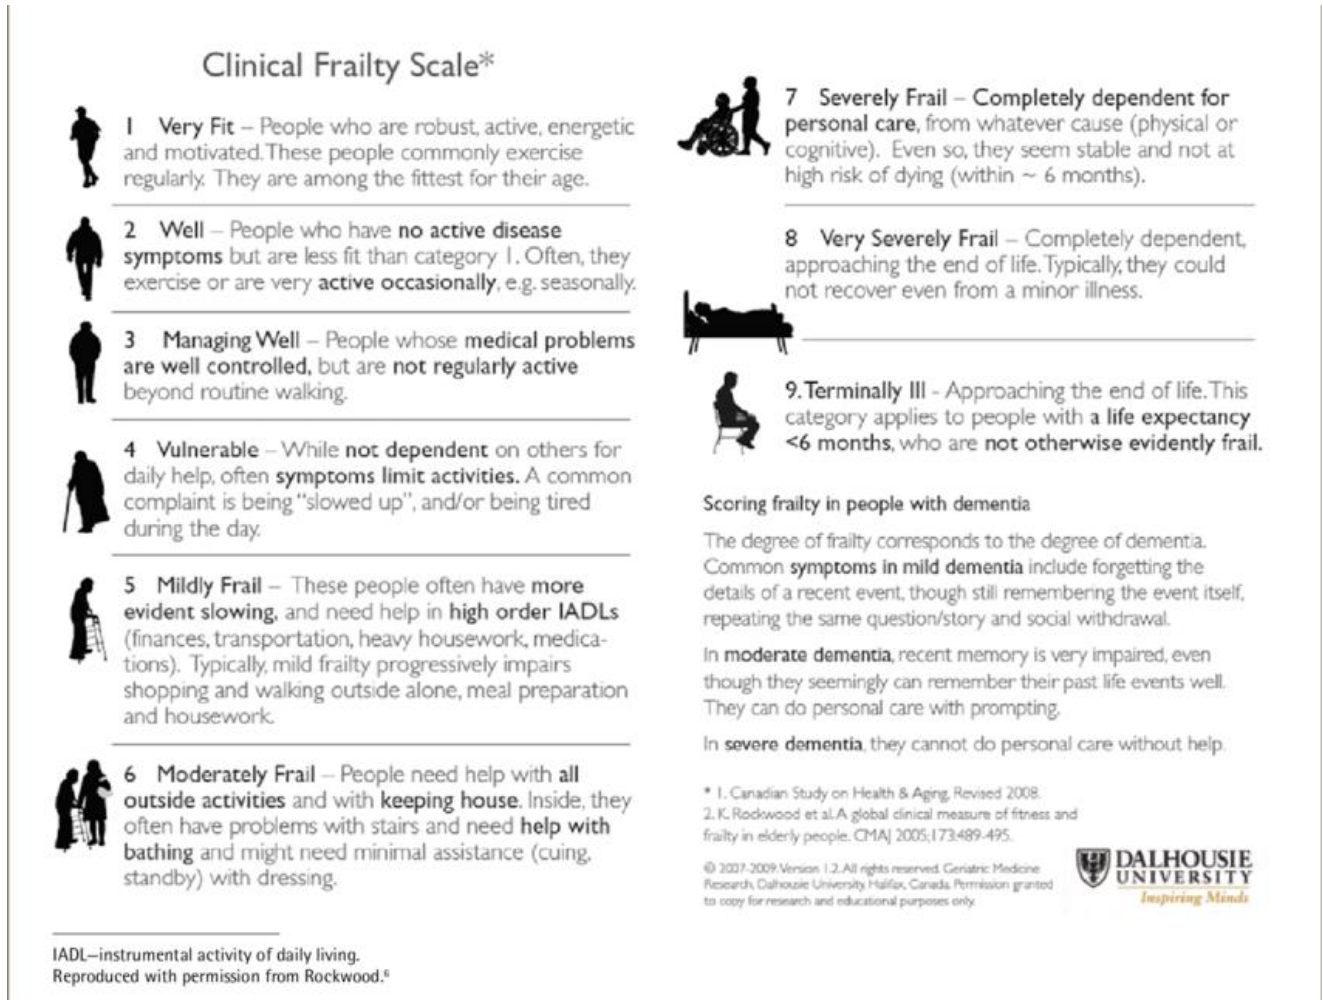

**eTable.** Cross-Tabulation Between the HFRS and CFS to Calculate the Sensitivity and Specificity of the HFRS in Detecting ‘Frail’ and ‘Non Frail’ Individuals Based on CFS Scoring

|                                               | CFS<br>Vulnerable/Mild/Mod/Severe<br>Frailty | CFS<br>Managing<br>Well/Well |
|-----------------------------------------------|----------------------------------------------|------------------------------|
| HFRS Frail<br>(Intermediate<br>and High Risk) | <b>23</b>                                    | <b>1</b>                     |
| HFRS Not Frail<br>(Low Risk)                  | <b>62</b>                                    | <b>13</b>                    |
|                                               | <b>Sensitivity</b>                           | <b>Specificity</b>           |
|                                               | <b>27.1%</b>                                 | <b>92.9%</b>                 |
