# Supplementary material for: Comparing the Hospital Frailty Risk Score and the Clinical Frailty Scale Among Older Adults With Chronic Obstructive Pulmonary Disease Exacerbation
Source: PubMed Central journal article supplement (PMC9896302; doi:10.1001/jamanetworkopen.2022.53692), 2023-02-02
Supplement: jamanetwopen-e2253692-s002.pdf [file jamanetwopen-e2253692-s002.pdf]

## **Data Sharing Statement**

Chin. Comparing the Hospital Frailty Risk Score and the Clinical Frailty Scale Among Older Adults With Chronic Obstructive Pulmonary Disease Exacerbation. *JAMA Netw Open*. Published February 02, 2023. doi:10.1001/jamanetworkopen.2022.53692

### **Data**

**Data available:** No
